# Supplementary material
Source: PubMed Central journal article supplement (PMC7339746)
Supplement: NIHMS1057981-supplement-Inventory_of_Supplemental_Material.pdf [file NIHMS1057981-supplement-Inventory_of_Supplemental_Material.pdf]

## INVENTORY OF SUPPLEMENTAL INFORMATION

### Supplementary Figures:

- Figure S1. Related to Figure 1
- Figure S2. Related to Figure 2
- Figure S3. Related to Figure 3
- Figure S4. Related to Figure 4
- Figure S5. Related to Figure 5
- Figure S6. Related to Figure 6
- Figure S7. Related to Figure 7

### Supplementary Tables:

**Supplemental Table 1.** KLF4 ChIP-seq peaks during reprogramming. Related to Figure 1

**Supplemental Table 2.** H3K27ac ChIP-seq peaks during reprogramming. Related to Figure 1

**Supplemental Table 3.** TPM values for RNA-seq in MEF, PSC and different stages of reprogramming. Related to all Figures

**Supplemental Table 4.** Coordinates of H3K27ac HiChIP MEF-specific loops, PSC-specific loops and constant. Related to Figure 2

**Supplemental Table 5.** Coordinates of enhancer hubs. Related to Figure 4

**Supplemental Table 6.** Coordinates of KLF4 HiChIP gained loops and lost loops, Related to Figure 5

**Supplemental Table 7.** List of proteins found to interact with KLF4 by RIME. Related to Figure 5

**Supplemental Table 8.** Coordinates of H3K27ac HiChIP in WT and TKO cells. Related to Figure 6

**Supplemental Table 9.** Primers and gRNAs used in this study, Related to Figures 4,6 and 7
