# Supplementary material
Source: PubMed Central journal article supplement (PMC7339746)

**FIGURE S8**

**For Figure 5g**

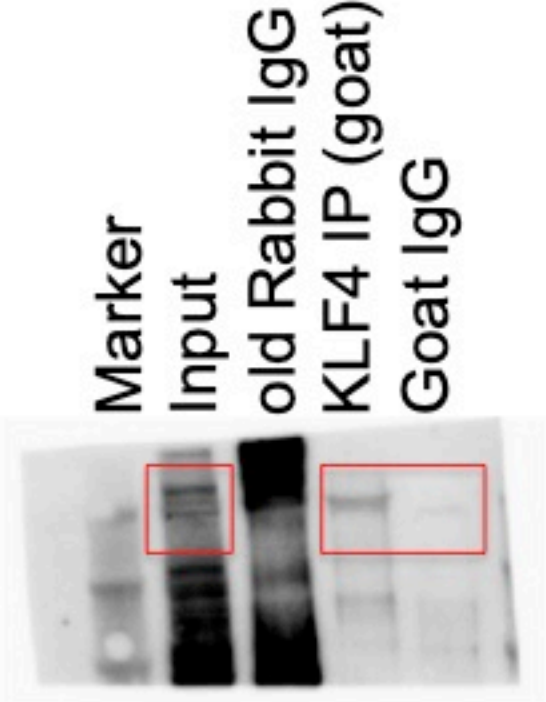

BRD4

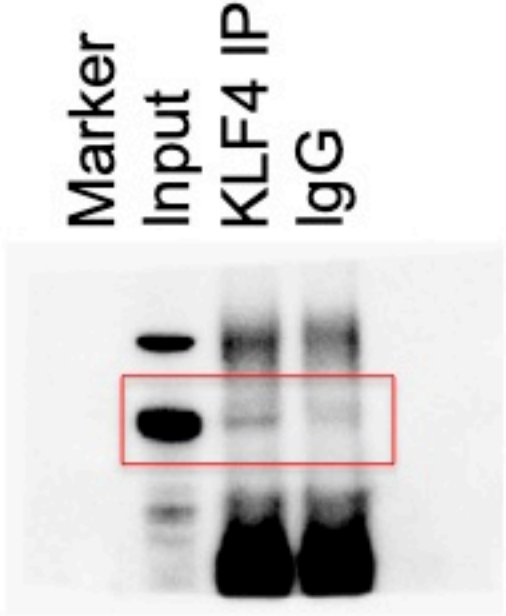

RING1B

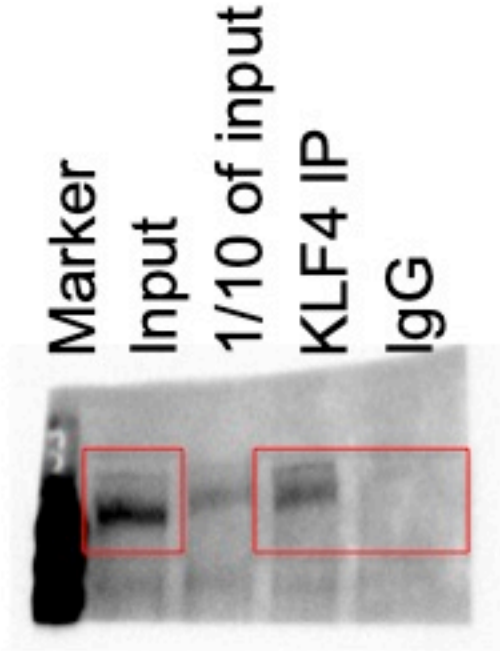

MED1

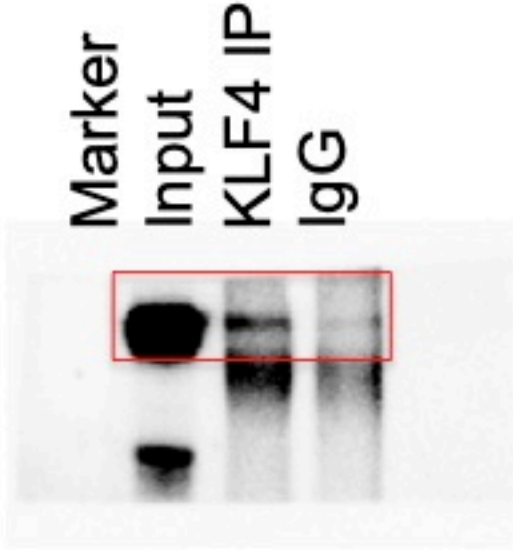

SUZ12

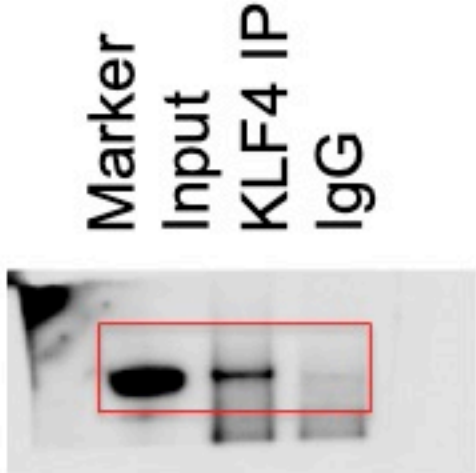

SMC1a

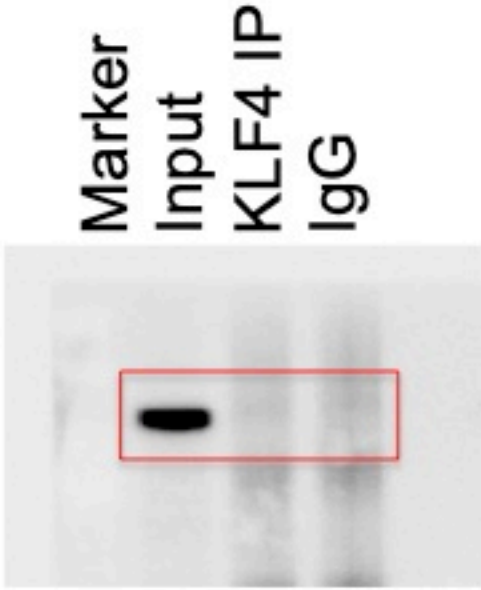

LSD1

## For Supplemental Figure 4d

### Tbx3 dist enh

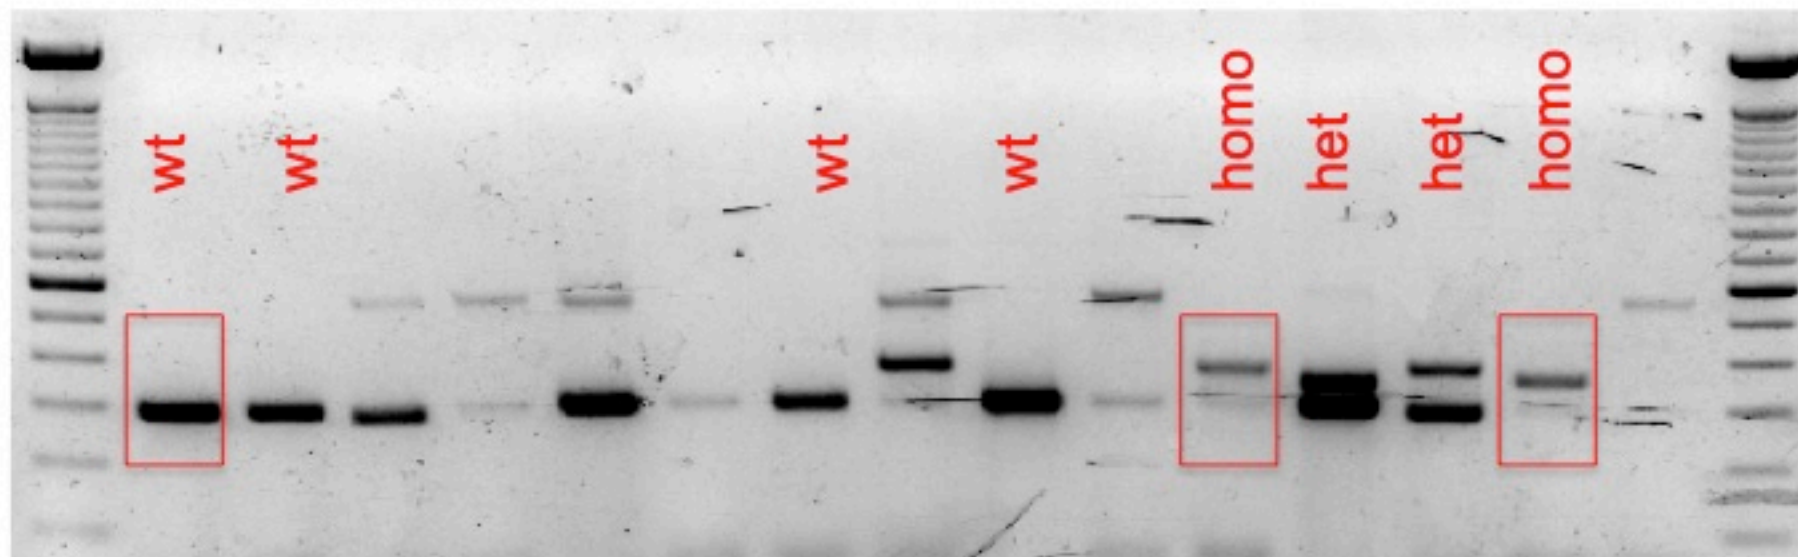

Expected sizes: wt=380, Knock out=504, inversion=495

### Tbx3 prox enh

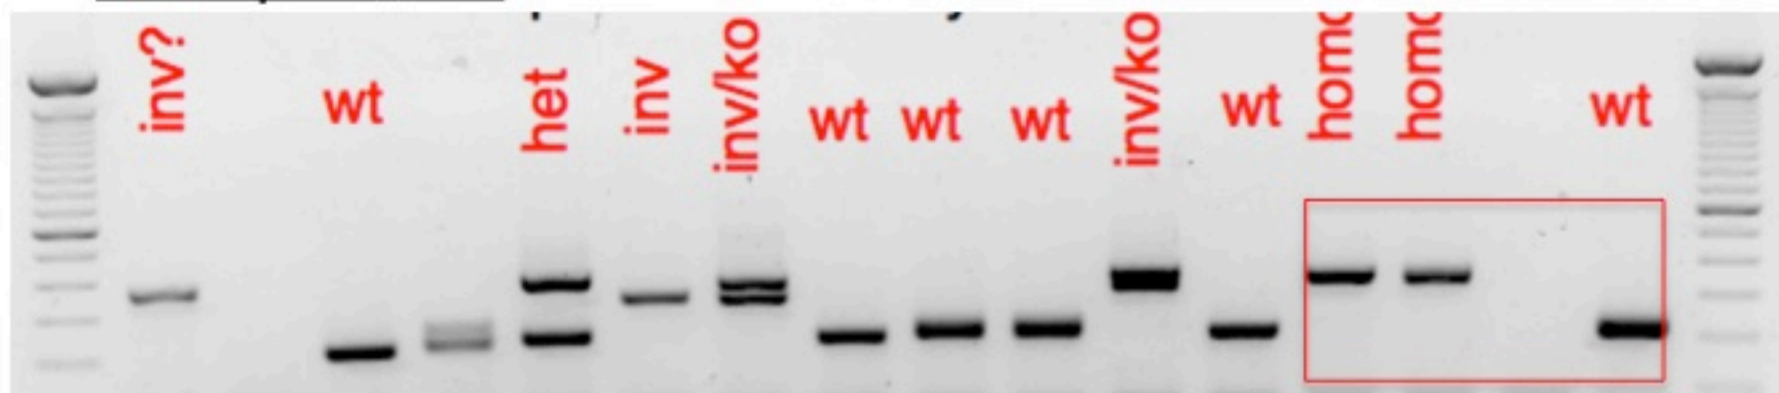

Expected sizes: wt=194, Knock out=348, inversion=302

## For Supplemental Figure 6a

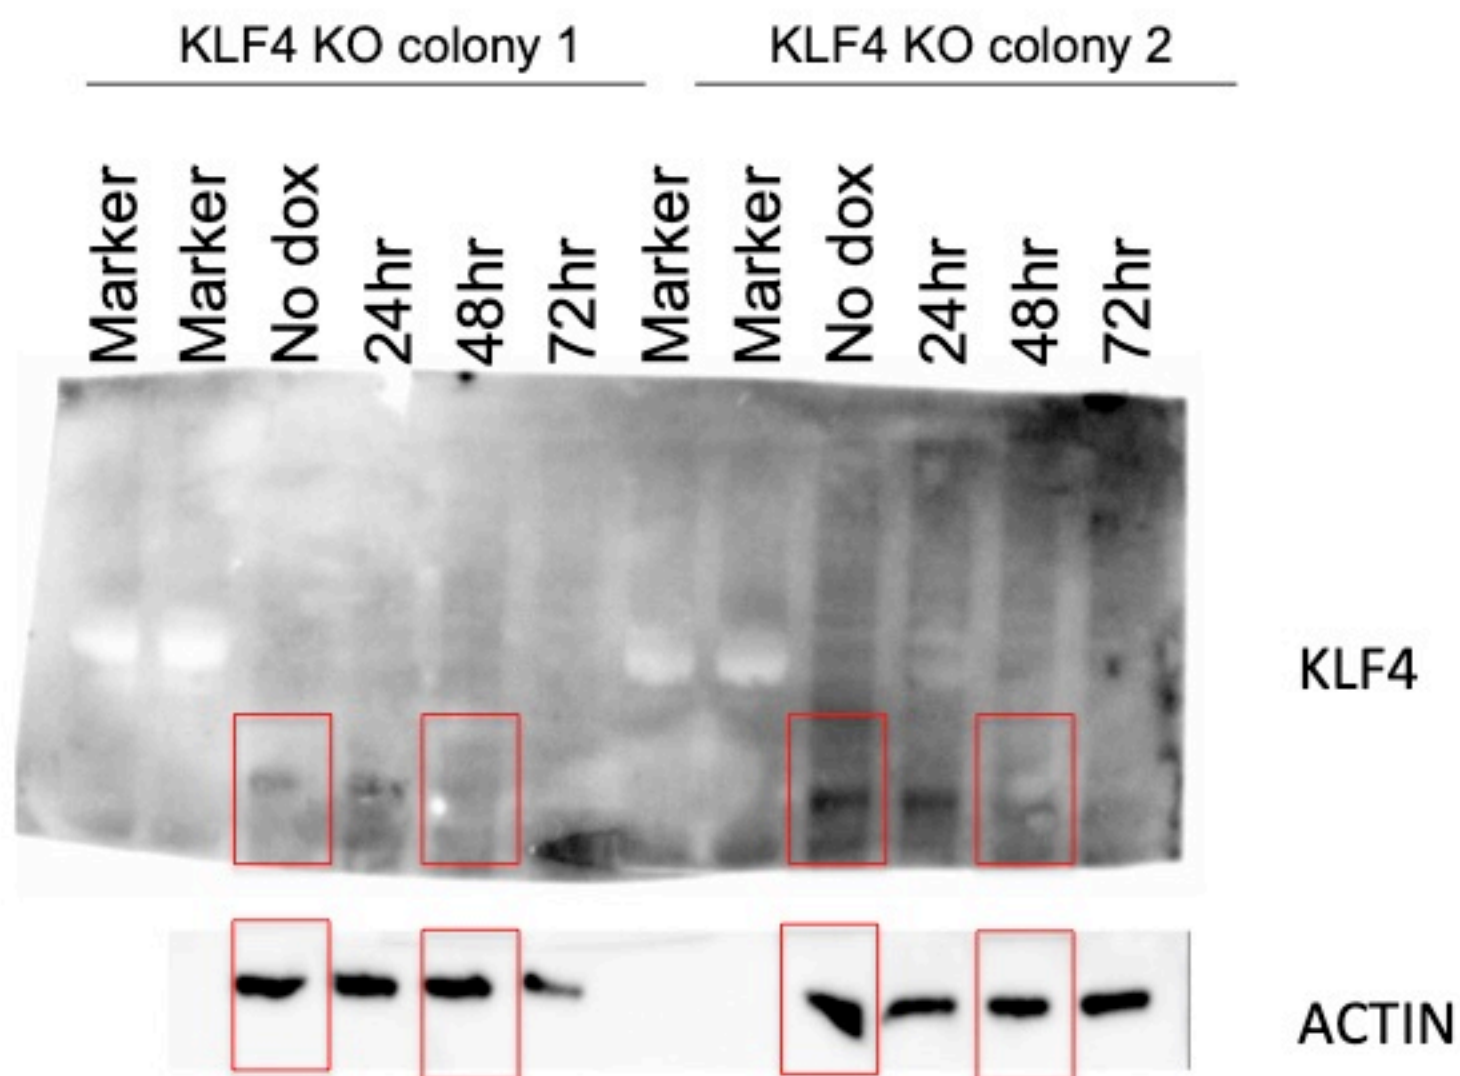

**For Supplemental Figure 6c**

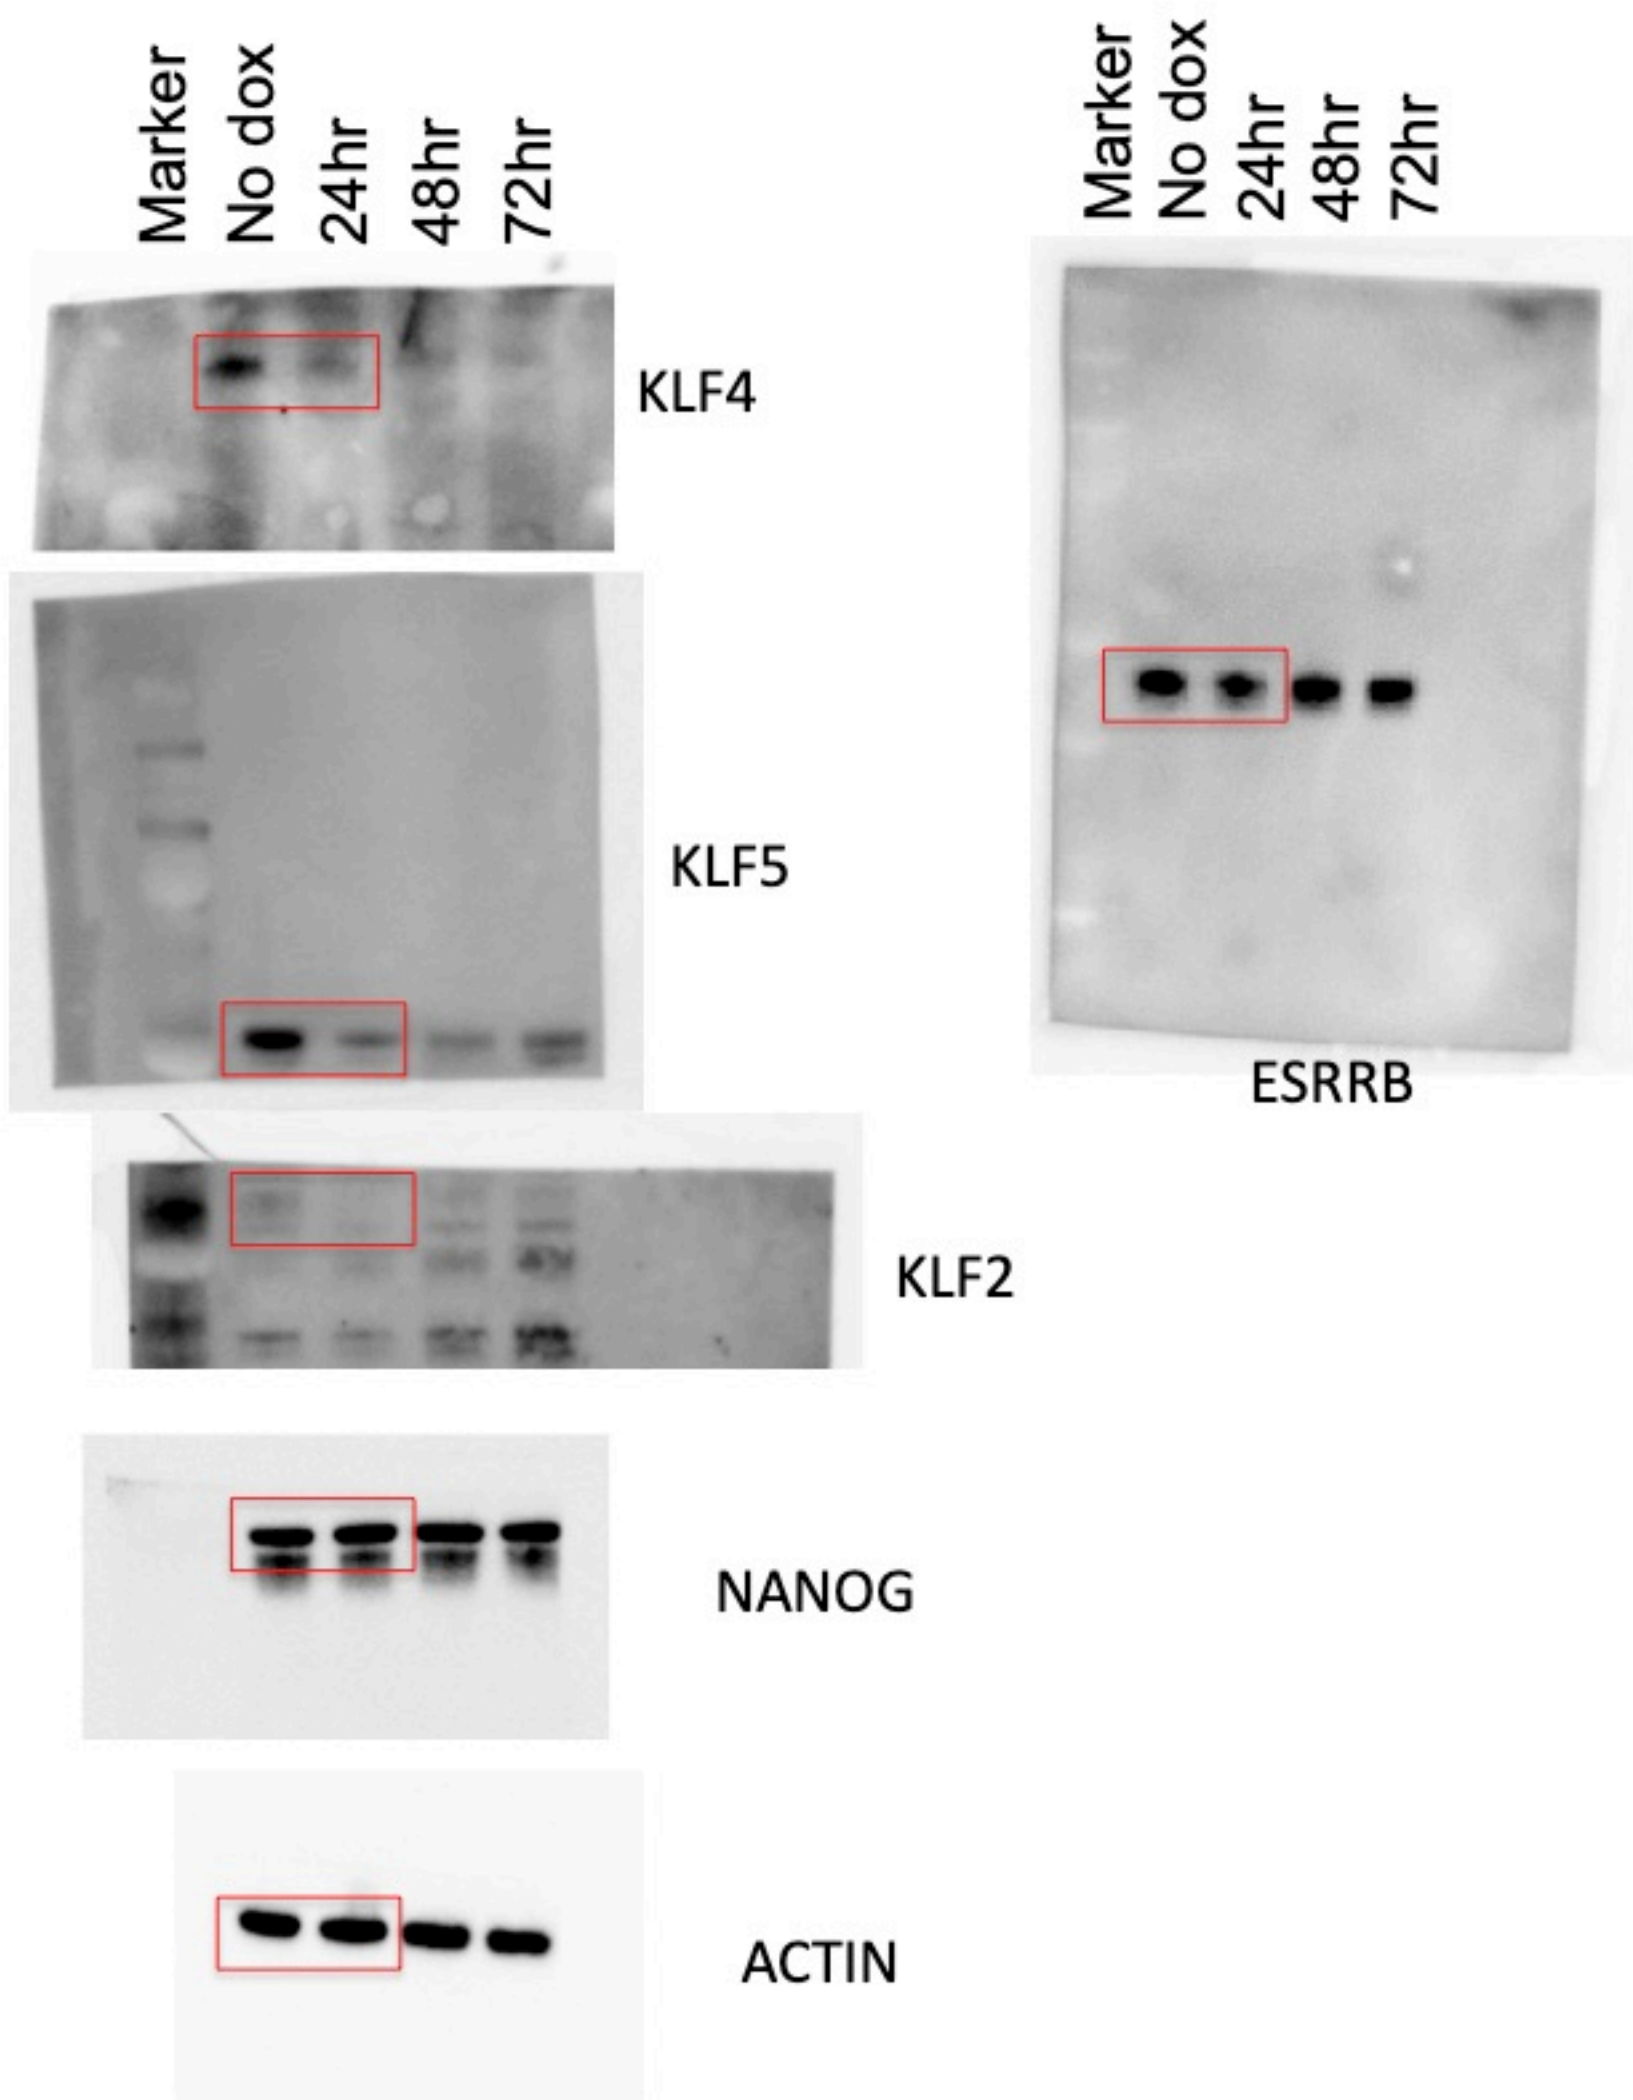

## For Supplemental Figure 7b

### Surveyour assay of KLF4 binding motif mutation in Tbx3 distal enhancer

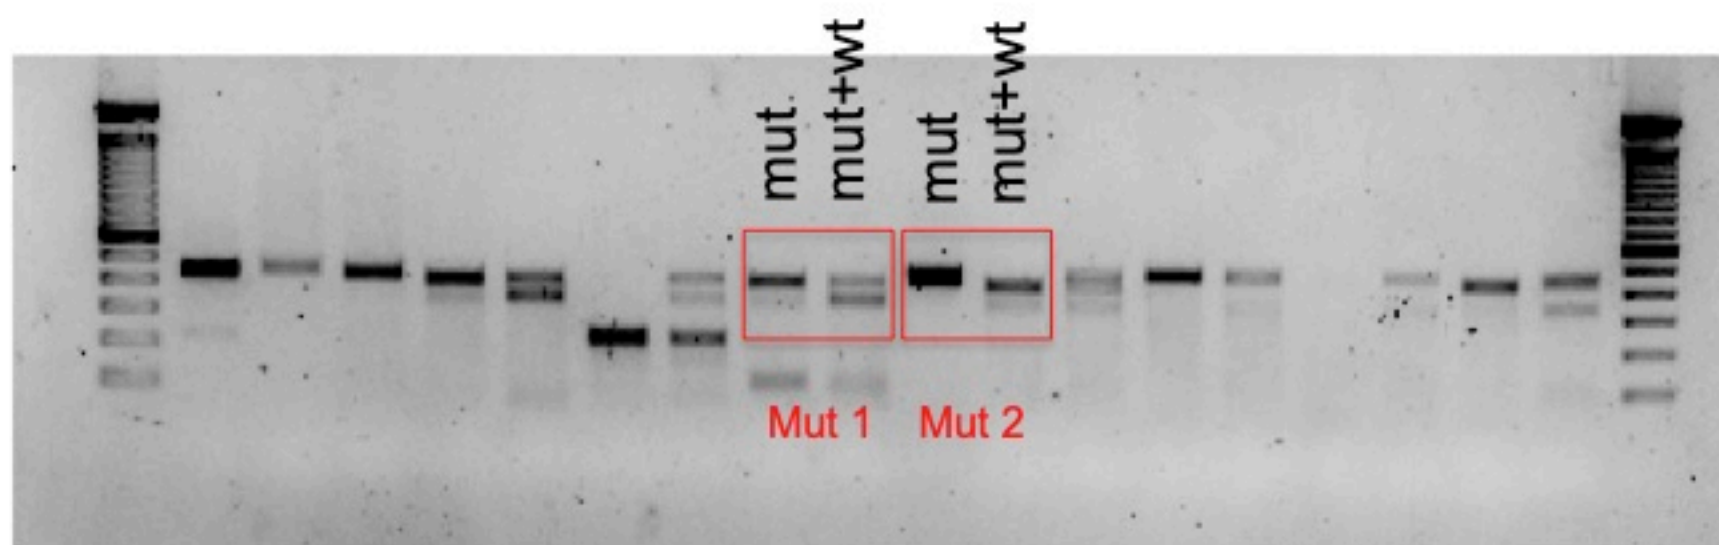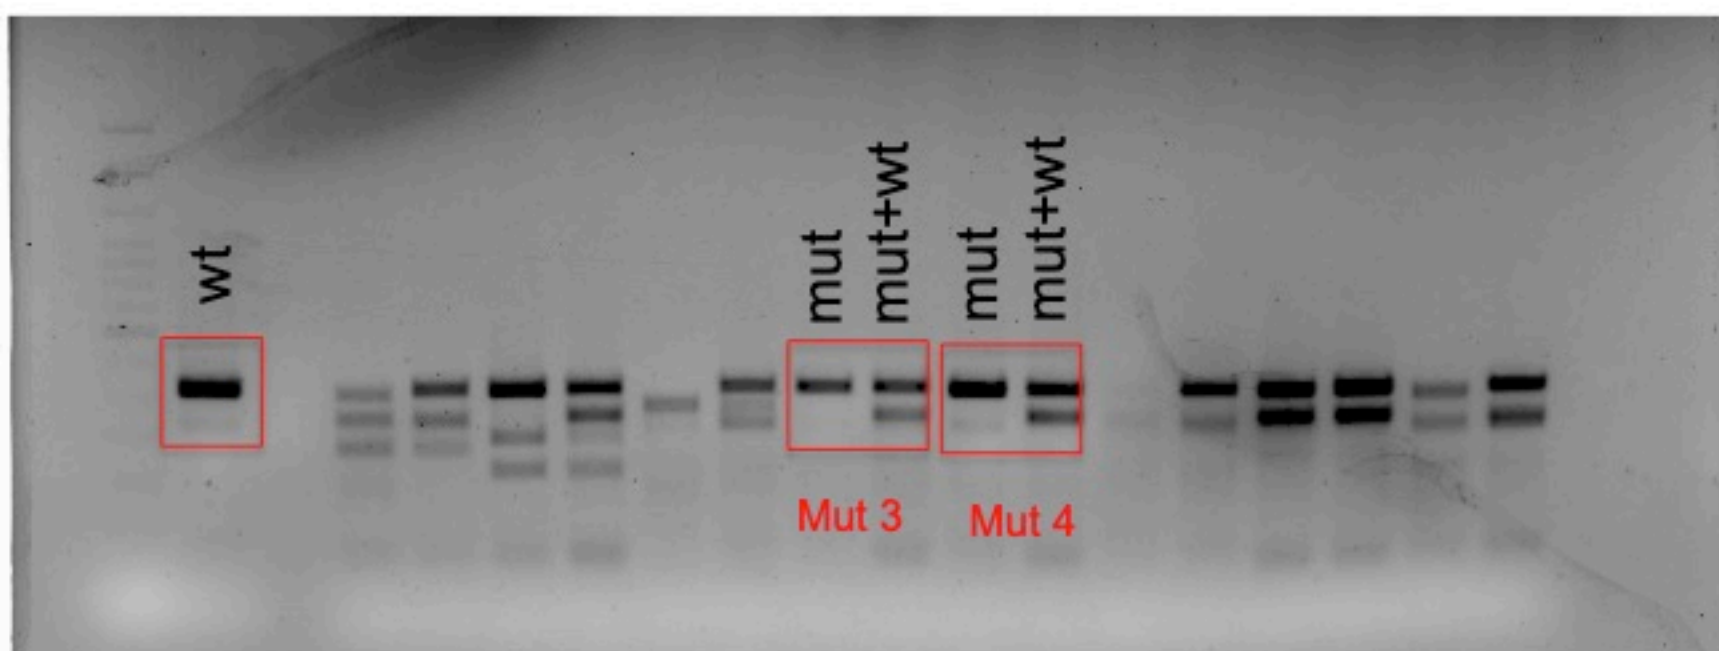

Supplement: NIHMS1057981-supplement-Supplemental_Figure_8.pdf [file NIHMS1057981-supplement-Supplemental_Figure_8.pdf]
